# Supplementary material for: Experimental adaptation of an influenza H5 HA confers respiratory droplet transmission to a reassortant H5 HA/H1N1 virus in ferrets
Source: Springer Nature journal article supplement (doi:10.1038/nature10831), 2012-05-01
Supplement: nature10831-s1.pdf [file nature10831-s1.pdf]

Browse Articles
| Nature


Skip to main content

Thank you for visiting nature.com. You are using a browser version with limited support for CSS. To obtain
the best experience, we recommend you use a more up to date browser (or turn off compatibility mode in
Internet Explorer). In the meantime, to ensure continued support, we are displaying the site without styles
and JavaScript.

Advertisement


- View all journals
- Search
- Log in

- Explore content
- About the journal
- Publish with us
- Subscribe

- Sign up for alerts
- RSS feed


1. nature
2. browse articles

# Browse Articles

## Filter By:

Article Type

All

- All
- Article (23154)
- Book Review (21164)
- Books & Arts (2987)
- Books Received (28076)
- Correspondence (11972)
- Editorial (4205)
- Erratum (1641)
- Letter (120287)
- Matters Arising (1725)
- Miscellany (7852)
- News (104852)
- News & Views (40698)
- News Feature (2412)
- News in Brief (1760)
- Obituary (7010)
- Opinion (5080)
- Research Highlight (2428)
- Research Highlights (4493)
- Scientific Correspondence (4028)
- Supplement to Nature (1556)

Year

All

- All
- 2024 (1570)
- 2023 (4320)
- 2022 (4104)
- 2021 (3737)
- 2020 (3623)
- 2019 (3979)
- 2018 (3934)
- 2017 (3696)
- 2016 (3903)
- 2015 (4056)
- 2014 (4078)
- 2013 (4119)
- 2012 (4260)
- 2011 (4115)
- 2010 (4173)
- 2009 (4396)
- 2008 (4681)
- 2007 (4089)
- 2006 (4072)
- 2005 (4066)

- ### World's brightest X-rays: China first in Asia to build next-generation synchrotron

  The US$665 million High Energy Photon Source (HEPS) outside Beijing puts China among only a handful of countries that have fourth-generation synchrotron light sources.

  - Gemma Conroy

  News13 May 2024
- ### Is the Internet bad for you? Huge study reveals surprise effect on well-being

  A survey of more than 2.4 million people finds that being online can have a positive effect on welfare.

  - Carissa Wong

  News12 May 2024
- ### These parrots go on killing sprees over real-estate shortages

  Scientists recorded green-rumped parrotlets pecking others’ chicks to death, probably to claim the nest space.

  Research Highlight10 May 2024
- ### A jawless-fish genome untangles the history of vertebrate genome multiplications

  Clarifying how genome duplication and triplication events shaped early vertebrate genomes has presented a challenge in evolutionary biology. The genome of the jawless hagfish provides a missing piece of this puzzle.

  Research Briefing10 May 2024
- ### Diana Wall obituary: ecologist who foresaw the importance of soil biodiversity

  Environmental scientist who revealed the crucial role of underground animals in sustainability.

  - Richard D. Bardgett

  Obituary10 May 2024
- ### Rhizobia–diatom symbiosis fixes missing nitrogen in the ocean

  - Bernhard Tschitschko
  - Mertcan Esti
  - Marcel M. M. Kuypers

  Article09 May 2024
- ### CRISPR therapy restores some vision to people with blindness

  People with an inherited condition that causes vision loss in childhood had vision improvements after treatment to replace a mutated gene.

  Research Highlight09 May 2024
- ### Daily briefing: ‘The ugly side of science’ — how to report negative results

  Data repositories, workshops and alternative journals allow scientists to destigmatize and discuss negative results. Plus, a major step toward ultra-precise ‘nuclear’ clocks and the first rocky exoplanet with a confirmed atmosphere.

  - Katrina Krämer

  Nature Briefing09 May 2024
- ### The US Congress is taking on AI —this computer scientist is helping

  Kiri Wagstaff, who temporarily shelved her academic career to provide advice on federal AI legislation, talks about life inside the halls of power.

  - Nicola Jones

  News Q&A09 May 2024
- ### Cubic millimetre of brain mapped in spectacular detail

  Google scientists have modelled a fragment of the human brain at nanoscale resolution, revealing cells with previously undiscovered features.

  - Carissa Wong

  News09 May 2024
- ### US TikTok ban: how the looming restriction is affecting scientists on the app

  *Nature* talks to researchers about what is at stake if users in the country lose access.

  - Ariana Remmel

  News09 May 2024
- ### How ignorance and gender inequality thwart treatment of a widespread illness

  Tens of millions of people have female genital schistosomiasis, a neglected tropical disease that few physicians have even heard of. Efforts are under way to move it out of obscurity and empower women and girls to access sexual and reproductive health care.

  - Claire Ainsworth

  Outlook09 May 2024
- ### Structural mechanism of angiogenin activation by the ribosome

  - Anna B. Loveland
  - Cha San Koh
  - Andrei A. Korostelev

  Article08 May 2024
- ### A secondary atmosphere on the rocky Exoplanet 55 Cancri e

  - Renyu Hu
  - Aaron Bello-Arufe
  - Brice-Olivier Demory

  Article08 May 2024
- ### Accurate structure prediction of biomolecular interactions with AlphaFold 3

  - Josh Abramson
  - Jonas Adler
  - John M. Jumper

  Article08 May 2024
- ### Elastic films of single-crystal two-dimensional covalent organic frameworks

  - Yonghang Yang
  - Baokun Liang
  - Zhikun Zheng

  Article08 May 2024
- ### Publisher Correction: High carrier mobility along the [111] orientation in Cu2O photoelectrodes

  - Linfeng Pan
  - Linjie Dai
  - Samuel D. Stranks

  Publisher CorrectionOpen Access08 May 2024
- ### Alphafold 3.0: the AI protein predictor gets an upgrade

  Deepmind’s protein-structure predictor adds other molecules to the mix, and a big step towards a ‘nuclear clock’.

  - Benjamin Thompson
  - Nick Petrić Howe

  Nature Podcast08 May 2024
- ### How the cauliflower got its curlicues

  More than 2,000 years of domestication have given the popular vegetable its short stem and clumpy ‘curds’.

  Research Highlight08 May 2024
- ### Mapping genotypes to chromatin accessibility profiles in single cells

  The *JAK2**V617F* mutation leads to epigenetic rewiring in a cell-intrinsic and cell-type-specific manner, influencing inflammation states and differentiation trajectories in patients with myeloproliferative neoplasms.

  - Franco Izzo
  - Robert M. Myers
  - Dan A. Landau

  Article08 May 2024

- Previous page
- page 1
- page 2
- page 3
- …
- page 21806
- Next page

## Explore content

- Research articles
- News
- Opinion
- Research Analysis
- Careers
- Books & Culture
- Podcasts
- Videos
- Current issue
- Browse issues
- Collections
- Subjects

- Follow us on Facebook
- Follow us on Twitter
- Subscribe
- Sign up for alerts
- RSS feed


## About the journal

- Journal Staff
- About the Editors
- Journal Information
- Our publishing models
- Editorial Values Statement
- Journal Metrics
- Awards
- Contact
- Editorial policies
- History of Nature
- Send a news tip


## Publish with us

- For Authors
- For Referees
- Language editing services
- Submit manuscript

## Search

Search articles by subject, keyword or author

Show results from

All journals
This journal

Search

Advanced search

### Quick links

- Explore articles by subject
- Find a job
- Guide to authors
- Editorial policies

Nature (*Nature*)

ISSN 1476-4687 (online)

ISSN 0028-0836 (print)

## nature.com sitemap

### About Nature Portfolio

- About us
- Press releases
- Press office
- Contact us

### Discover content

- Journals A-Z
- Articles by subject
- protocols.io
- Nature Index

### Publishing policies

- Nature portfolio policies
- Open access

### Author & Researcher services

- Reprints & permissions
- Research data
- Language editing
- Scientific editing
- Nature Masterclasses
- Research Solutions

### Libraries & institutions

- Librarian service & tools
- Librarian portal
- Open research
- Recommend to library

### Advertising & partnerships

- Advertising
- Partnerships & Services
- Media kits
- Branded
  content

### Professional development

- Nature Careers
- Nature 
  Conferences

### Regional websites

- Nature Africa
- Nature China
- Nature India
- Nature Italy
- Nature Japan
- Nature Middle East

- Privacy
  Policy
- Use
  of cookies
- Your privacy choices/Manage cookies
- Legal
  notice
- Accessibility
  statement
- Terms & Conditions
- Your US state privacy rights

© 2024 Springer Nature Limited

xml version="1.0" encoding="UTF-8"?
